# Supplementary material for: Stability and magnetic properties of transition metal (V, Cr, Mn, and Fe) doped cobalt oxide clusters: a density functional theory investigation
Source: Royal Society of Chemistry journal article supplement (doi:10.1039/d4ra05482b), 2024-01-01
Supplement: d4ra05482b1.pdf [file d4ra05482b1.pdf]

# Stability and magnetic properties of transition metal (V, Cr, Mn and Fe) doped cobalt oxide clusters: A density functional theory investigation

Nguyen Thi Mai,<sup>a\*</sup> Tran Dang Thanh,<sup>a\*</sup> Do Hung Manh,<sup>a</sup> Nguyen Thi Ngoc Anh,<sup>a</sup>  
Ngo Thi Lan,<sup>a,b</sup> Phung Thi Thu<sup>c</sup>, and Nguyen Thanh Tung

<sup>a</sup>Institute of Materials Science, Vietnam Academy of Science and Technology, 18 Hoang  
Quoc Viet, Cau Giay, Hanoi, Vietnam

<sup>b</sup>Institute of Science and Technology, TNU-University of Sciences, Thai Nguyen City  
250000, Vietnam

<sup>c</sup>University of Science and Technology of Hanoi, Vietnam Academy of Science and  
Technology, 18 Hoang Quoc Viet, Cau Giay, Hanoi, Vietnam

## SUPPORTING INFORMATION

Figure S1. Calculated geometries of ground-state structures and stable low-lying isomers of  $\text{Co}_{n-1}\text{TMO}_{n-2}^+$  clusters with ( $n=6-8$ ). The values after slash indicate the spin multiplicities and the differences in total energy (in eV) from the corresponding ground states. We denote each structure as a.TM.b.x, in which a and b stands for number of Co and O atoms in cluster  $\text{Co}_{n-1}\text{TMO}_{n-2}^+$  and x is labeled as A, B, C and D for isomers with increasing order of energy. The red, blue, dark gray, pink, green, and cyan spheres represent O, Co, V, Cr, Mn, and Fe atoms.

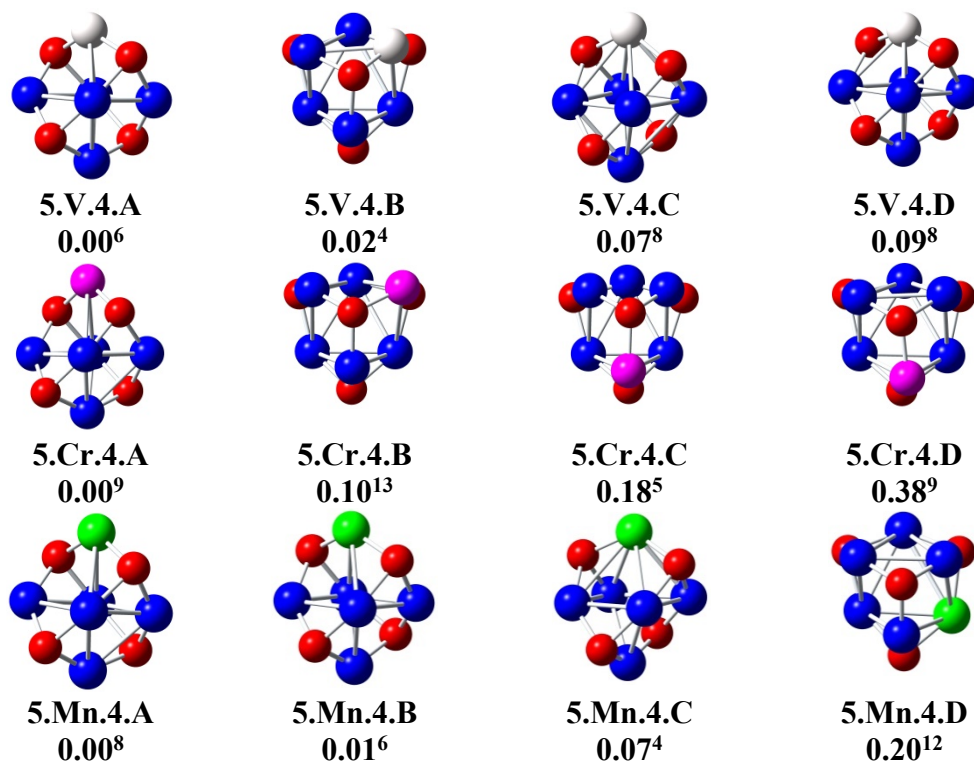

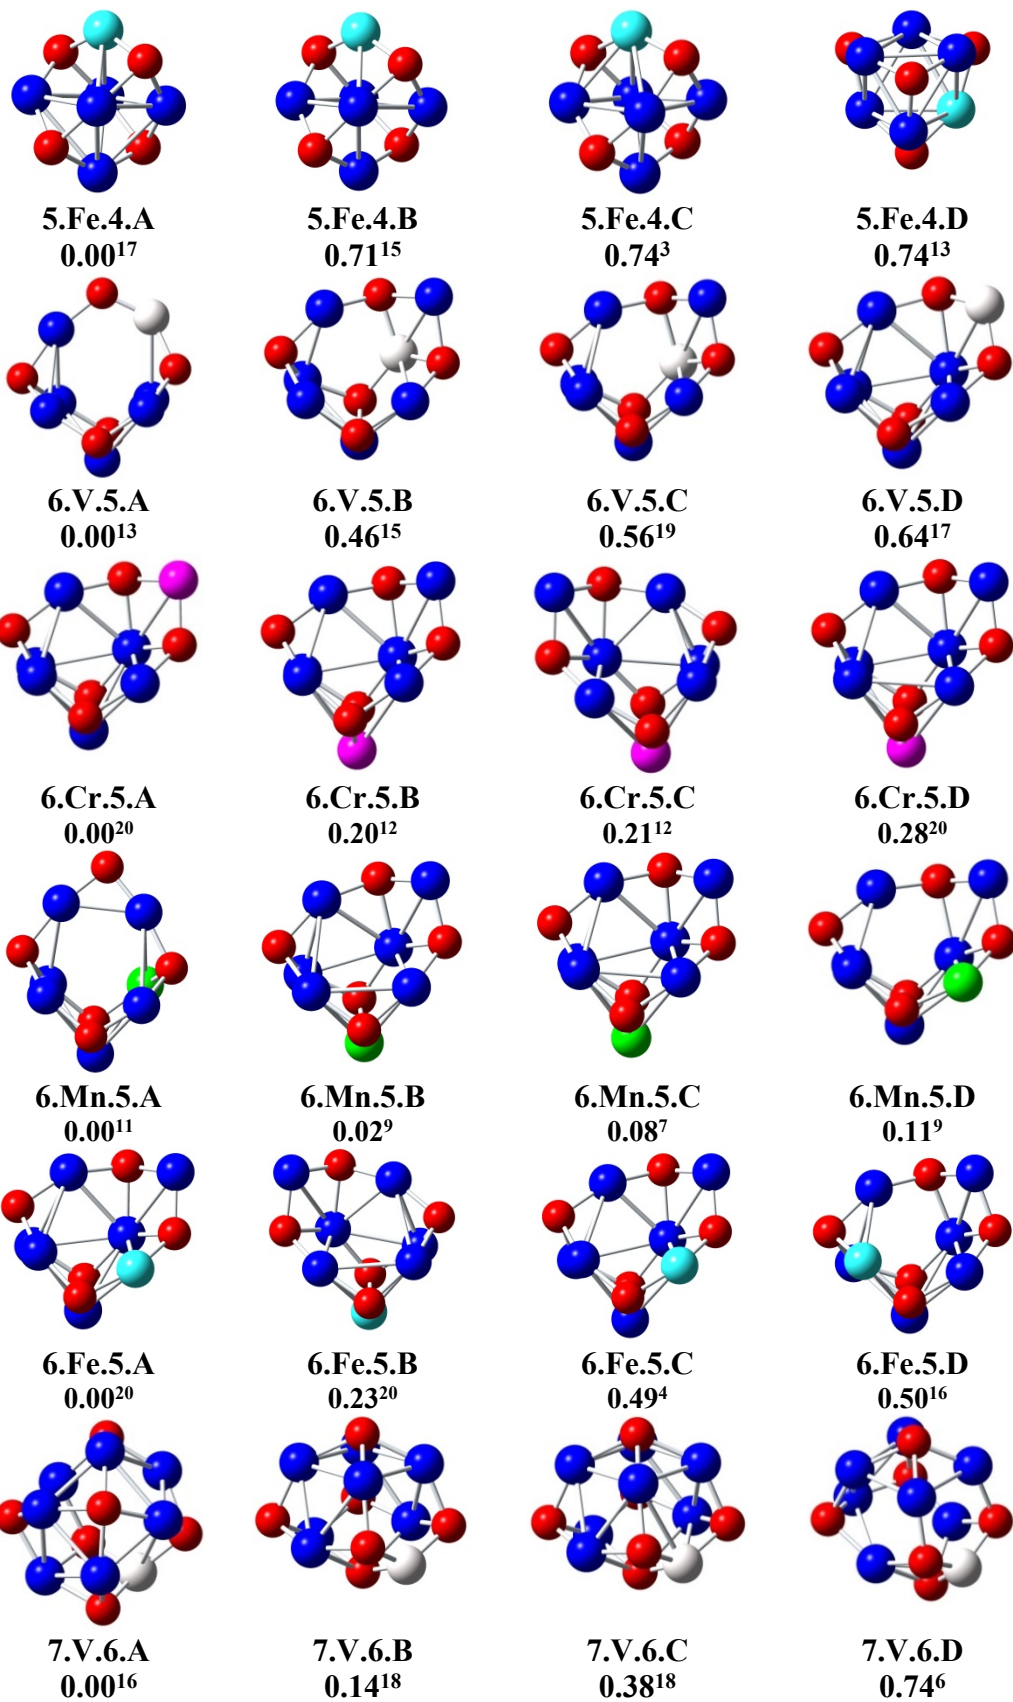

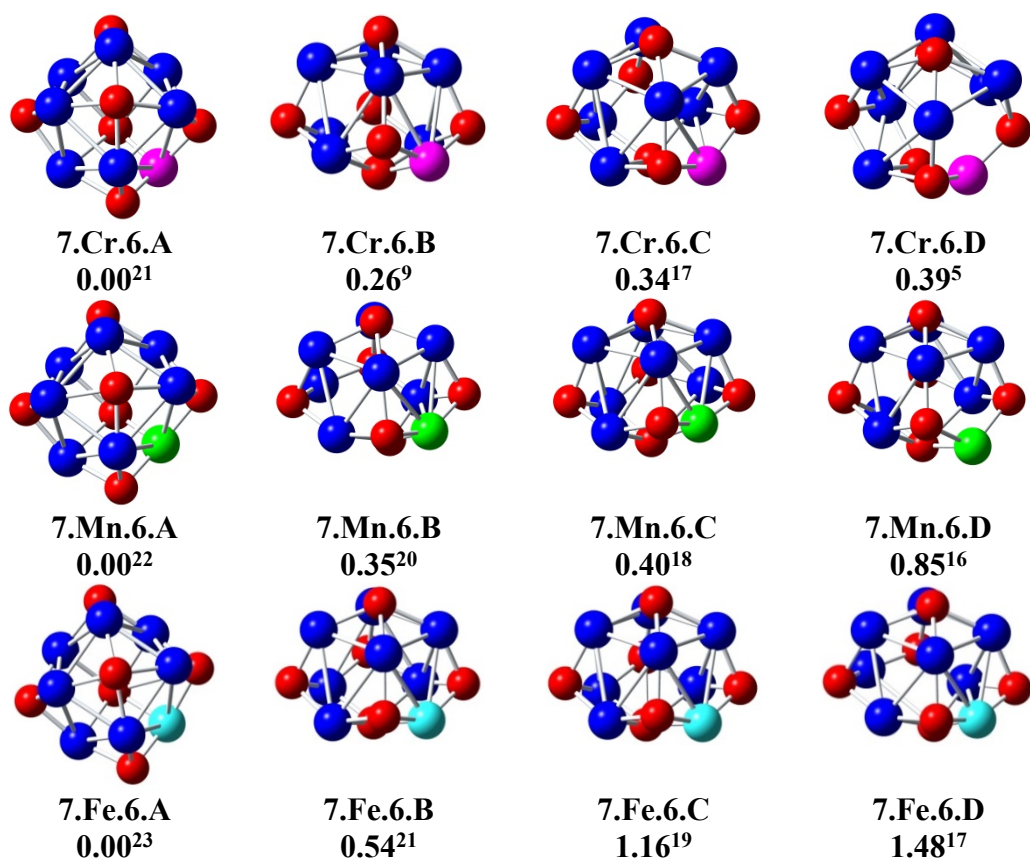

Table S1. Comparison table of different calculation functions for TM-O dimers.

| Functional | Basis set | $E_b$ (eV)             |                        |                        |                        |                        |
|------------|-----------|------------------------|------------------------|------------------------|------------------------|------------------------|
|            |           | Co-O                   | V-O                    | Cr-O                   | Mn-O                   | Fe-O                   |
| B3LYP      | 6-31+G(d) | 3.48                   | 6.29                   | 4.26                   | 3.96                   | 4.78                   |
|            | Lanl2dz   | 2.90                   | 5.74                   | 4.06                   | 2.87                   | 2.62                   |
| B3P86      | 6-31+G(d) | 4.37                   | 7.49                   | 3.90                   | 2.64                   | 4.08                   |
|            | Lanl2dz   | 2.95                   | 5.82                   | 4.16                   | 2.90                   | 3.99                   |
| B3PW91     | 6-31+G(d) | 3.08                   | 6.12                   | 3.69                   | 2.45                   | 2.85                   |
|            | Lanl2dz   | 1.16                   | 5.54                   | 3.96                   | 2.71                   | 2.88                   |
| PBEPBE     | 6-31+G(d) | 4.86                   | 7.19                   | 4.47                   | 2.99                   | 3.63                   |
|            | Lanl2dz   | 3.03                   | 0.75                   | 4.71                   | 3.28                   | 3.60                   |
| Exp        |           | $3.98 \pm 0.14$<br>[1] | $6.49 \pm 0.19$<br>[1] | $4.45 \pm 0.30$<br>[1] | $4.18 \pm 0.43$<br>[1] | $4.05 \pm 0.18$<br>[1] |

[1]. J. Shee et al. J. Chem. Theory Comput. 2019, 15, 4, 2346.

Table S2. The binding energy for Co-TM dimers.

| Functional | Basis set | $E_b$ (eV) |      |       |       |       |
|------------|-----------|------------|------|-------|-------|-------|
|            |           | Co-Co      | Co-V | Co-Cr | Co-Mn | Co-Fe |
| B3LYP      | 6-31+G(d) | 1.38       | 1.43 | 1.25  | 0.88  | 1.52  |

Table S3. The binding energy for Co-TM dimers

| Clusters                                      | Loss TM  | Loss Co  | Loss O   | Loss CoO |
|-----------------------------------------------|----------|----------|----------|----------|
| Co <sub>5</sub> VO <sub>4</sub> <sup>+</sup>  | 0.002072 | 0.001463 | 0.001619 | 0.002474 |
| Co <sub>5</sub> CrO <sub>4</sub> <sup>+</sup> | 0.00201  | 0.000504 | 0.001453 | 0.002333 |
| Co <sub>5</sub> MnO <sub>4</sub> <sup>+</sup> | 0.002053 | 0.001645 | 0.001514 | 0.002461 |
| Co <sub>5</sub> FeO <sub>4</sub> <sup>+</sup> | 0.001942 | 0.001458 | 0.001419 | 0.002289 |
| Co <sub>6</sub> VO <sub>5</sub> <sup>+</sup>  | 0.001468 | 0.001262 | 0.001689 | 0.001553 |
| Co <sub>6</sub> CrO <sub>5</sub> <sup>+</sup> | 0.001452 | 0.001302 | 0.001641 | 0.001656 |
| Co <sub>6</sub> MnO <sub>5</sub> <sup>+</sup> | 0.001408 | 0.00129  | 0.001467 | 0.0016   |
| Co <sub>6</sub> FeO <sub>5</sub> <sup>+</sup> | 0.001424 | 0.001241 | 0.001416 | 0.001662 |
| Co <sub>7</sub> VO <sub>6</sub> <sup>+</sup>  | 0.0018   | 0.001437 | 0.001654 | 0.002067 |
| Co <sub>7</sub> CrO <sub>6</sub> <sup>+</sup> | 0.001877 | 0.001557 | 0.001518 | 0.002105 |
| Co <sub>7</sub> MnO <sub>6</sub> <sup>+</sup> | 0.001803 | 0.001433 | 0.001425 | 0.002043 |
| Co <sub>7</sub> FeO <sub>6</sub> <sup>+</sup> | 0.001758 | 0.001517 | 0.001562 | 0.002046 |

Table S4. AOs contributions in the SOMOs of the cation Co<sub>6</sub>O<sub>4</sub><sup>+</sup>, Co<sub>7</sub>O<sub>5</sub><sup>+</sup>, and Co<sub>8</sub>O<sub>6</sub><sup>+</sup> clusters.

| Clusters                                    | Co    |       |      |
|---------------------------------------------|-------|-------|------|
|                                             | 4s    | 4p    | 3d   |
| Co <sub>6</sub> O <sub>4</sub> <sup>+</sup> | -0.01 | -0.02 | 2.08 |
| Co <sub>7</sub> O <sub>5</sub> <sup>+</sup> | 0.00  | -0.01 | 2.36 |
| Co <sub>8</sub> O <sub>6</sub> <sup>+</sup> | -0.01 | -0.01 | 2.00 |

Table S5: Local and total unpaired electrons of the cation Co<sub>6</sub>O<sub>4</sub><sup>+</sup>, Co<sub>7</sub>O<sub>5</sub><sup>+</sup>, and Co<sub>8</sub>O<sub>6</sub><sup>+</sup> clusters.

| Atom       | Co <sub>6</sub> O <sub>4</sub> <sup>+</sup> | Co <sub>7</sub> O <sub>5</sub> <sup>+</sup> | Co <sub>8</sub> O <sub>6</sub> <sup>+</sup> |
|------------|---------------------------------------------|---------------------------------------------|---------------------------------------------|
| Co (1)     | 1.96                                        | 2.30                                        | 2.57                                        |
| Co (2)     | 1.87                                        | 2.44                                        | 1.03                                        |
| Co (3)     | 2.15                                        | 2.28                                        | 2.18                                        |
| Co (4)     | 2.20                                        | 2.23                                        | 2.08                                        |
| Co (5)     | 2.06                                        | 2.33                                        | 2.20                                        |
| Co (6)     | 2.00                                        | 2.27                                        | 1.06                                        |
| Co (7)     | -                                           | 2.57                                        | 2.20                                        |
| Co (8)     | -                                           | -                                           | 2.49                                        |
| O (1)      | 0.20                                        | 0.28                                        | 0.30                                        |
| O (2)      | 0.27                                        | 0.30                                        | 0.21                                        |
| O (3)      | 0.09                                        | 0.27                                        | 0.21                                        |
| O (4)      | 0.19                                        | 0.38                                        | 0.19                                        |
| O (5)      | -                                           | 0.36                                        | 0.21                                        |
| O (6)      | -                                           | -                                           | 0.07                                        |
| <b>TMM</b> | <b>13.00</b>                                | <b>18.00</b>                                | <b>17.00</b>                                |

Table S6. AOs contributions in the SOMOs of the cation Co<sub>5</sub>TMO<sub>4</sub><sup>+</sup> clusters.

| Clusters                                     | TM    |       |       | Co    |       |      |
|----------------------------------------------|-------|-------|-------|-------|-------|------|
|                                              | 4s    | 4p    | 3d    | 4s    | 4p    | 3d   |
| Co <sub>5</sub> VO <sub>4</sub> <sup>+</sup> | -0.14 | -0.03 | -2.46 | -0.01 | -0.02 | 1.49 |

|                             |       |       |       |       |       |      |
|-----------------------------|-------|-------|-------|-------|-------|------|
| $\text{Co}_5\text{CrO}_4^+$ | -0.15 | -0.03 | -3.68 | -0.02 | -0.03 | 2.23 |
| $\text{Co}_5\text{MnO}_4^+$ | -0.11 | -0.04 | -4.51 | -0.01 | -0.02 | 2.22 |
| $\text{Co}_5\text{FeO}_4^+$ | 0.02  | 0.00  | 3.45  | 0.00  | -0.01 | 2.28 |

Table S7. Local and total unpaired electrons of the cation  $\text{Co}_5\text{TMO}_4^+$  clusters.

| No.          | Atom | $\text{Co}_5\text{O}_4^+@V$ | $\text{Co}_5\text{O}_4^+@Cr$ | $\text{Co}_5\text{O}_4^+@Mn$ | $\text{Co}_5\text{O}_4^+@Fe$ |
|--------------|------|-----------------------------|------------------------------|------------------------------|------------------------------|
| 1            | Co   | 1.80                        | 2.16                         | 2.16                         | 2.35                         |
| 2            | Co   | 2.15                        | 2.18                         | 2.19                         | 2.27                         |
| 3            | Co   | 0.36                        | 2.13                         | 2.25                         | 2.29                         |
| 4            | Co   | 1.79                        | 2.23                         | 2.17                         | 2.13                         |
| 5            | Co   | 1.22                        | 2.23                         | 2.20                         | 2.28                         |
| 6            | O    | -0.05                       | 0.13                         | 0.31                         | 0.28                         |
| 7            | O    | 0.13                        | 0.33                         | 0.32                         | 0.28                         |
| 8            | O    | 0.08                        | 0.32                         | 0.03                         | 0.33                         |
| 9            | O    | 0.16                        | 0.13                         | 0.04                         | 0.32                         |
| 10           | TM   | -2.63                       | -3.86                        | -4.66                        | 3.47                         |
| <b>Total</b> |      | <b>5</b>                    | <b>8</b>                     | <b>7</b>                     | <b>16</b>                    |

Table S8. AOs contributions in the SOMOs of the cation  $\text{Co}_6\text{TMO}_5^+$  clusters.

| Clusters                    | TM        |           |           | Co        |           |           |
|-----------------------------|-----------|-----------|-----------|-----------|-----------|-----------|
|                             | <b>4s</b> | <b>4p</b> | <b>3d</b> | <b>4s</b> | <b>4p</b> | <b>3d</b> |
| $\text{Co}_6\text{VO}_5^+$  | 0.03      | 0.00      | 2.13      | 0.00      | -0.01     | 1.54      |
| $\text{Co}_6\text{CrO}_5^+$ | 0.11      | 0.03      | 3.80      | 0.00      | -0.01     | 2.31      |
| $\text{Co}_6\text{MnO}_5^+$ | -0.10     | -0.05     | -4.53     | 0.01      | -0.01     | 2.27      |
| $\text{Co}_6\text{FeO}_5^+$ | 0.06      | 0.00      | 3.39      | 0.00      | -0.01     | 2.33      |

Table S9. Local and total unpaired electrons of the cation  $\text{Co}_6\text{TMO}_5^+$  clusters.

| No.          | Atom | $\text{Co}_6\text{VO}_5^+$ | $\text{Co}_6\text{CrO}_5^+$ | $\text{Co}_6\text{MnO}_5^+$ | $\text{Co}_6\text{FeO}_5^+$ |
|--------------|------|----------------------------|-----------------------------|-----------------------------|-----------------------------|
| 1            | Co   | 2.08                       | 2.26                        | 2.25                        | 2.15                        |
| 2            | Co   | 2.31                       | 2.40                        | 2.35                        | 2.40                        |
| 3            | Co   | 2.34                       | 2.28                        | 2.26                        | 2.25                        |
| 4            | Co   | 2.22                       | 2.27                        | 2.23                        | 2.36                        |
| 5            | Co   | 2.30                       | 2.35                        | 2.22                        | 2.19                        |
| 6            | Co   | -2.05                      | 2.27                        | 2.34                        | 2.58                        |
| 7            | O    | 0.29                       | 0.27                        | 0.04                        | 0.29                        |
| 8            | O    | 0.27                       | 0.33                        | 0.30                        | 0.36                        |
| 9            | O    | 0.06                       | 0.27                        | 0.05                        | 0.26                        |
| 10           | O    | 0.17                       | 0.17                        | 0.39                        | 0.37                        |
| 11           | O    | -0.16                      | 0.17                        | 0.27                        | 0.35                        |
| 12           | TM   | 2.16                       | 3.95                        | -4.69                       | 3.45                        |
| <b>Total</b> |      | <b>12</b>                  | <b>19</b>                   | <b>10</b>                   | <b>19</b>                   |

Table S10. AOs contributions in the SOMOs of the cation  $\text{Co}_7\text{TMO}_6^+$  clusters.

| Clusters                    | TM    |       |       | Co    |       |      |
|-----------------------------|-------|-------|-------|-------|-------|------|
|                             | 4s    | 4p    | 3d    | 4s    | 4p    | 3d   |
| $\text{Co}_7\text{VO}_6^+$  | -0.06 | -0.02 | -1.83 | -0.03 | -0.02 | 2.17 |
| $\text{Co}_7\text{CrO}_6^+$ | 0.05  | 0.02  | 2.78  | -0.01 | -0.01 | 2.29 |
| $\text{Co}_7\text{MnO}_6^+$ | 0.03  | 0.00  | 3.51  | 0.01  | -0.01 | 2.28 |
| $\text{Co}_7\text{FeO}_6^+$ | 0.10  | 0.00  | 3.55  | -0.01 | -0.01 | 2.37 |

Table S11. Local and total unpaired electrons of the cation  $\text{Co}_7\text{TMO}_6^+$  clusters.

| No.          | Atom | $\text{Co}_7\text{VO}_6^+$ | $\text{Co}_7\text{CrO}_6^+$ | $\text{Co}_7\text{MnO}_6^+$ | $\text{Co}_7\text{FeO}_6^+$ |
|--------------|------|----------------------------|-----------------------------|-----------------------------|-----------------------------|
| 1            | Co   | 2.57                       | 2.62                        | 2.55                        | 2.62                        |
| 2            | Co   | 2.14                       | 2.11                        | 2.08                        | 2.19                        |
| 3            | Co   | 2.22                       | 2.13                        | 2.17                        | 2.15                        |
| 4            | Co   | 2.11                       | 2.11                        | 2.07                        | 2.19                        |
| 5            | Co   | 2.41                       | 2.38                        | 2.54                        | 2.64                        |
| 6            | Co   | 2.09                       | 2.12                        | 2.00                        | 2.20                        |
| 7            | Co   | 2.04                       | 2.39                        | 2.51                        | 2.50                        |
| 8            | O    | 0.10                       | 0.12                        | 0.19                        | 0.31                        |
| 9            | O    | 0.32                       | 0.31                        | 0.29                        | 0.33                        |
| 10           | O    | 0.15                       | 0.12                        | 0.20                        | 0.33                        |
| 11           | O    | 0.36                       | 0.29                        | 0.33                        | 0.34                        |
| 12           | O    | 0.19                       | 0.22                        | 0.24                        | 0.22                        |
| 13           | O    | 0.21                       | 0.24                        | 0.27                        | 0.42                        |
| 14           | TM   | -1.91                      | 2.85                        | 3.55                        | 3.57                        |
| <b>Total</b> |      | <b>15</b>                  | <b>20</b>                   | <b>21</b>                   | <b>22</b>                   |

Table S12. Cartesian coordinates of optimized  $\text{Co}_5\text{TMO}_4^+$  (TM = V, Cr, Mn and Fe) clusters.

| $\text{Co}_5\text{TMO}_4^+$ | X           | Y           | Z           |
|-----------------------------|-------------|-------------|-------------|
| TM = V                      |             |             |             |
| Co                          | -1.38178900 | 0.74560700  | 1.10636800  |
| Co                          | -1.29513200 | -0.73399600 | -1.11171300 |
| Co                          | -0.00202000 | 1.59035800  | -1.17007100 |
| Co                          | 1.36101000  | -0.71282400 | -1.11277000 |
| Co                          | 1.37629000  | 0.75283700  | 1.05496800  |
| V                           | -0.14517800 | -1.65907400 | 1.21524800  |
| O                           | 1.76248100  | 1.06967900  | -0.77920100 |
| O                           | -1.74497600 | 1.04472700  | -0.71688900 |
| O                           | 0.03736700  | -0.08629000 | 2.12042500  |
| O                           | 0.03194800  | -2.01102600 | -0.60636600 |

TM = Cr

|    |             |             |             |
|----|-------------|-------------|-------------|
| Co | -1.37490300 | 0.79000500  | 1.17605300  |
| Co | -1.38878800 | -0.74507400 | -1.08137400 |
| Co | -0.04049800 | 1.58785700  | -1.07889400 |
| Co | -0.08614200 | -1.45497700 | 1.07686200  |
| Co | 1.21295800  | 0.78790000  | 1.07787100  |
| Cr | 1.64181000  | -0.94702200 | -1.29539300 |
| O  | 1.70151800  | 0.82013300  | -0.74382700 |
| O  | -1.77436700 | 1.03324000  | -0.64784700 |
| O  | -0.02914500 | 0.00976100  | 2.26668500  |
| O  | 0.13755900  | -1.88182500 | -0.75013400 |

TM = Mn

|    |             |             |             |
|----|-------------|-------------|-------------|
| Co | -1.34967100 | 0.69217600  | 1.15387800  |
| Co | -1.32963600 | -0.77822900 | -1.12251400 |
| Co | -0.07113500 | 1.61728800  | -1.05321200 |
| Co | 1.26075800  | -0.60556200 | -1.18442000 |
| Co | 1.29376300  | 0.83204100  | 1.01152800  |
| Mn | 0.06371400  | -1.79342000 | 1.21345800  |
| O  | 1.75615300  | 1.16900200  | -0.78727500 |
| O  | -1.79940500 | 0.97285500  | -0.65703100 |
| O  | 0.08789000  | -0.11167200 | 2.11501700  |
| O  | 0.08756900  | -1.99448300 | -0.68942700 |

TM = Fe

|    |             |             |             |
|----|-------------|-------------|-------------|
| Co | -1.30585600 | 0.86561700  | 1.12834600  |
| Co | -1.30925600 | -0.83092900 | -1.12721600 |
| Co | 0.10194700  | -1.62796900 | 1.15176100  |
| Co | 1.26508400  | 0.77877100  | 1.06285200  |
| Co | 1.28961500  | -0.75968100 | -1.09585300 |
| Fe | -0.03521800 | 1.65232400  | -1.13879800 |
| O  | 1.70969800  | 1.08087700  | -0.77742100 |
| O  | -1.76433100 | 0.95356100  | -0.71337400 |
| O  | -0.00479100 | -0.03167900 | 2.16999900  |
| O  | 0.05310900  | -2.08089500 | -0.66029600 |

Table S13. Cartesian coordinates of optimized  $\text{Co}_6\text{TMO}_5^+$  (TM = V, Cr, Mn and Fe) clusters.

| $\text{Co}_6\text{TMO}_5^+$ | X           | Y           | Z           |
|-----------------------------|-------------|-------------|-------------|
| TM = V                      |             |             |             |
| Co                          | -1.33594500 | -1.42814200 | -0.11979700 |
| Co                          | 0.48725800  | -0.33050700 | -2.12941800 |
| Co                          | 0.74110600  | 1.86705800  | -0.67649100 |
| Co                          | -1.23940400 | 0.69984200  | 1.38339000  |
| Co                          | -1.62334700 | 0.89563500  | -1.24443800 |
| Co                          | 2.33875700  | -0.45631300 | -0.22506900 |

|   |             |             |             |
|---|-------------|-------------|-------------|
| V | 0.64456700  | -1.99823200 | 1.69973800  |
| O | -0.97394700 | 2.03442600  | 0.11210500  |
| O | -1.29716200 | -0.86483900 | -1.90619400 |
| O | -1.01750600 | -1.17134900 | 1.71889400  |
| O | 1.91319700  | 0.74201100  | -1.57912600 |
| O | 2.23015200  | -1.58258400 | 1.21255500  |

TM = Cr

|    |             |             |             |
|----|-------------|-------------|-------------|
| Co | 0.83499300  | 1.53489200  | -1.31089000 |
| Co | 1.22750700  | -0.90679200 | 0.00035500  |
| Co | -0.63060900 | -0.45315400 | -1.88363400 |
| Co | -0.63051800 | -0.45388600 | 1.88449700  |
| Co | -1.41837000 | 1.68219600  | 0.00014500  |
| Co | 0.83422700  | 1.53483800  | 1.30971100  |
| Cr | -0.32648700 | -3.19476700 | -0.00014000 |
| O  | -1.01740100 | 1.37688800  | 1.78860600  |
| O  | 1.99902300  | 0.86802400  | -0.00003200 |
| O  | -1.01705200 | 1.37712900  | -1.78879300 |
| O  | 0.17933200  | -2.03139300 | 1.36375100  |
| O  | 0.17893700  | -2.03089300 | -1.36357600 |

TM = Mn

|    |             |             |             |
|----|-------------|-------------|-------------|
| Co | 0.68702900  | 1.91190300  | -1.31558800 |
| Co | 1.92892500  | -0.51541400 | -0.87902200 |
| Co | -0.43087600 | -0.52181600 | -1.76572700 |
| Co | -0.99103100 | -0.66139800 | 1.99000500  |
| Co | 1.01409100  | 1.43679500  | 1.07984600  |
| Co | -0.30338500 | -2.35320200 | 0.27008600  |
| Mn | -1.76488500 | 1.26884900  | 0.19217600  |
| O  | -0.66978700 | 1.18449300  | 1.78909200  |
| O  | 2.19184000  | 1.25018500  | -0.33046700 |
| O  | -1.05411000 | 1.26749000  | -1.59947200 |
| O  | -1.18565500 | -2.39693400 | 1.80653100  |
| O  | 0.70098300  | -1.89811400 | -1.23745800 |

TM = Fe

|    |             |             |             |
|----|-------------|-------------|-------------|
| Co | -1.65368800 | -1.53364000 | 0.02020400  |
| Co | 0.65122600  | -0.76508400 | -1.26313900 |
| Co | 0.68821000  | 1.80501800  | -0.61499400 |
| Co | -1.31416100 | 0.71539000  | 1.25621000  |
| Co | -1.66901000 | 0.81893100  | -1.29103900 |
| Co | 3.13657600  | -0.26573000 | -0.27973400 |
| Fe | 0.53478500  | -1.56653100 | 1.37164700  |
| O  | -1.04001700 | 2.07473800  | 0.03956000  |
| O  | -1.24292400 | -0.95035900 | -1.68140100 |
| O  | -1.20449900 | -1.08509400 | 1.84386300  |
| O  | 2.03691500  | 0.75974200  | -1.32172000 |
| O  | 1.94431400  | -1.60037400 | 0.16669100  |



Table S14. Cartesian coordinates of optimized  $\text{Co}_7\text{TMO}_6^+$  (TM = V, Cr, Mn and Fe) clusters.

| $\text{Co}_7\text{TMO}_6^+$ | X           | Y           | Z           |
|-----------------------------|-------------|-------------|-------------|
| TM = V                      |             |             |             |
| Co                          | 0.03755000  | -1.75216000 | 1.30427300  |
| Co                          | 1.17128200  | 1.24533800  | -1.17008200 |
| Co                          | -1.24049800 | -1.28233400 | -1.16038700 |
| Co                          | -1.26766400 | 1.25903600  | -1.29236600 |
| Co                          | -2.11119000 | 0.03921900  | 0.93441200  |
| Co                          | 1.23001200  | -1.32271200 | -1.23762600 |
| Co                          | 2.39876700  | 0.01253900  | 0.75974400  |
| V                           | 0.02669300  | 1.65612900  | 1.44525000  |
| O                           | 1.65631000  | 1.81128300  | 0.59971200  |
| O                           | 1.79704800  | -1.72598100 | 0.49242300  |
| O                           | -1.55825700 | 1.87032100  | 0.47544600  |
| O                           | -1.74803700 | -1.80280200 | 0.54325000  |
| O                           | -0.02413100 | -0.05167500 | -2.09614900 |
| O                           | -0.36788600 | 0.04380100  | 2.10836000  |
| TM = Cr                     |             |             |             |
| Co                          | 0.00587200  | -1.89122700 | 1.35917900  |
| Co                          | 1.21295800  | 1.26257100  | -1.23601700 |
| Co                          | -1.24177300 | -1.29832500 | -1.21856400 |
| Co                          | -1.21360600 | 1.26364400  | -1.23612600 |
| Co                          | -2.00585000 | 0.00080300  | 0.87239100  |
| Co                          | 1.22131300  | -1.29863100 | -1.19258500 |
| Co                          | 1.99549700  | 0.00177800  | 0.88404100  |
| Cr                          | 0.00226800  | 1.81863900  | 1.46962000  |
| O                           | 1.57682000  | 1.88974100  | 0.53810300  |
| O                           | 1.72891800  | -1.84552800 | 0.53037600  |
| O                           | -1.57409800 | 1.88549600  | 0.54282700  |
| O                           | -1.72666100 | -1.83680300 | 0.51402500  |
| O                           | 0.00149700  | -0.02608200 | -2.09229200 |
| O                           | 0.01684300  | 0.07392400  | 1.97128400  |
| TM = Mn                     |             |             |             |
| Co                          | 0.01358000  | -1.86948400 | 1.23795500  |
| Co                          | 1.35362100  | 1.31772700  | -1.15197500 |
| Co                          | -1.34576500 | -1.31898900 | -1.22666200 |
| Co                          | -1.25477700 | 1.21351300  | -1.18644200 |
| Co                          | -2.05478100 | -0.04067100 | 1.06953600  |
| Co                          | 1.15084100  | -1.26065200 | -1.15074600 |
| Co                          | 2.12364000  | -0.02397800 | 0.94868200  |
| Mn                          | -0.00228800 | 1.81099900  | 1.06529200  |
| O                           | 1.80227900  | 1.85127400  | 0.64262000  |

|   |             |             |             |
|---|-------------|-------------|-------------|
| O | 1.77542400  | -1.84770400 | 0.52926500  |
| O | -1.81007700 | 1.80405700  | 0.54999400  |
| O | -1.77862500 | -1.84373000 | 0.55952800  |
| O | 0.06567300  | 0.08917100  | -1.96849300 |
| O | -0.03874700 | 0.11846700  | 1.78770700  |

TM = Fe

|    |             |             |             |
|----|-------------|-------------|-------------|
| Co | 1.28500700  | 1.28995500  | -1.15664500 |
| Co | -1.27000500 | -1.26140500 | -1.20073300 |
| Co | -1.25281500 | 1.25440100  | -1.17718900 |
| Co | -1.95637300 | 0.00056000  | 1.16537000  |
| Co | 1.25621100  | -1.25399600 | -1.18709800 |
| Co | 1.96605500  | -0.01448700 | 1.06147100  |
| Co | -0.00540500 | 1.96698300  | 1.08987500  |
| Fe | 0.00744400  | -1.91796200 | 1.25412700  |
| O  | 1.82703800  | 1.82058300  | 0.55500500  |
| O  | 1.78407500  | -1.86172300 | 0.50294300  |
| O  | -1.84269200 | 1.78178500  | 0.51981000  |
| O  | -1.80241300 | -1.80456000 | 0.47215300  |
| O  | 0.01052500  | 0.01191500  | -2.02847100 |
| O  | -0.00665200 | -0.01204800 | 1.83564000  |
